# Supplementary material for: UNaProd: A Universal Natural Product Database for Materia Medica of Iranian Traditional Medicine
Source: Hindawi journal article supplement (doi:10.1155/2020/3690781), 2020-01-01

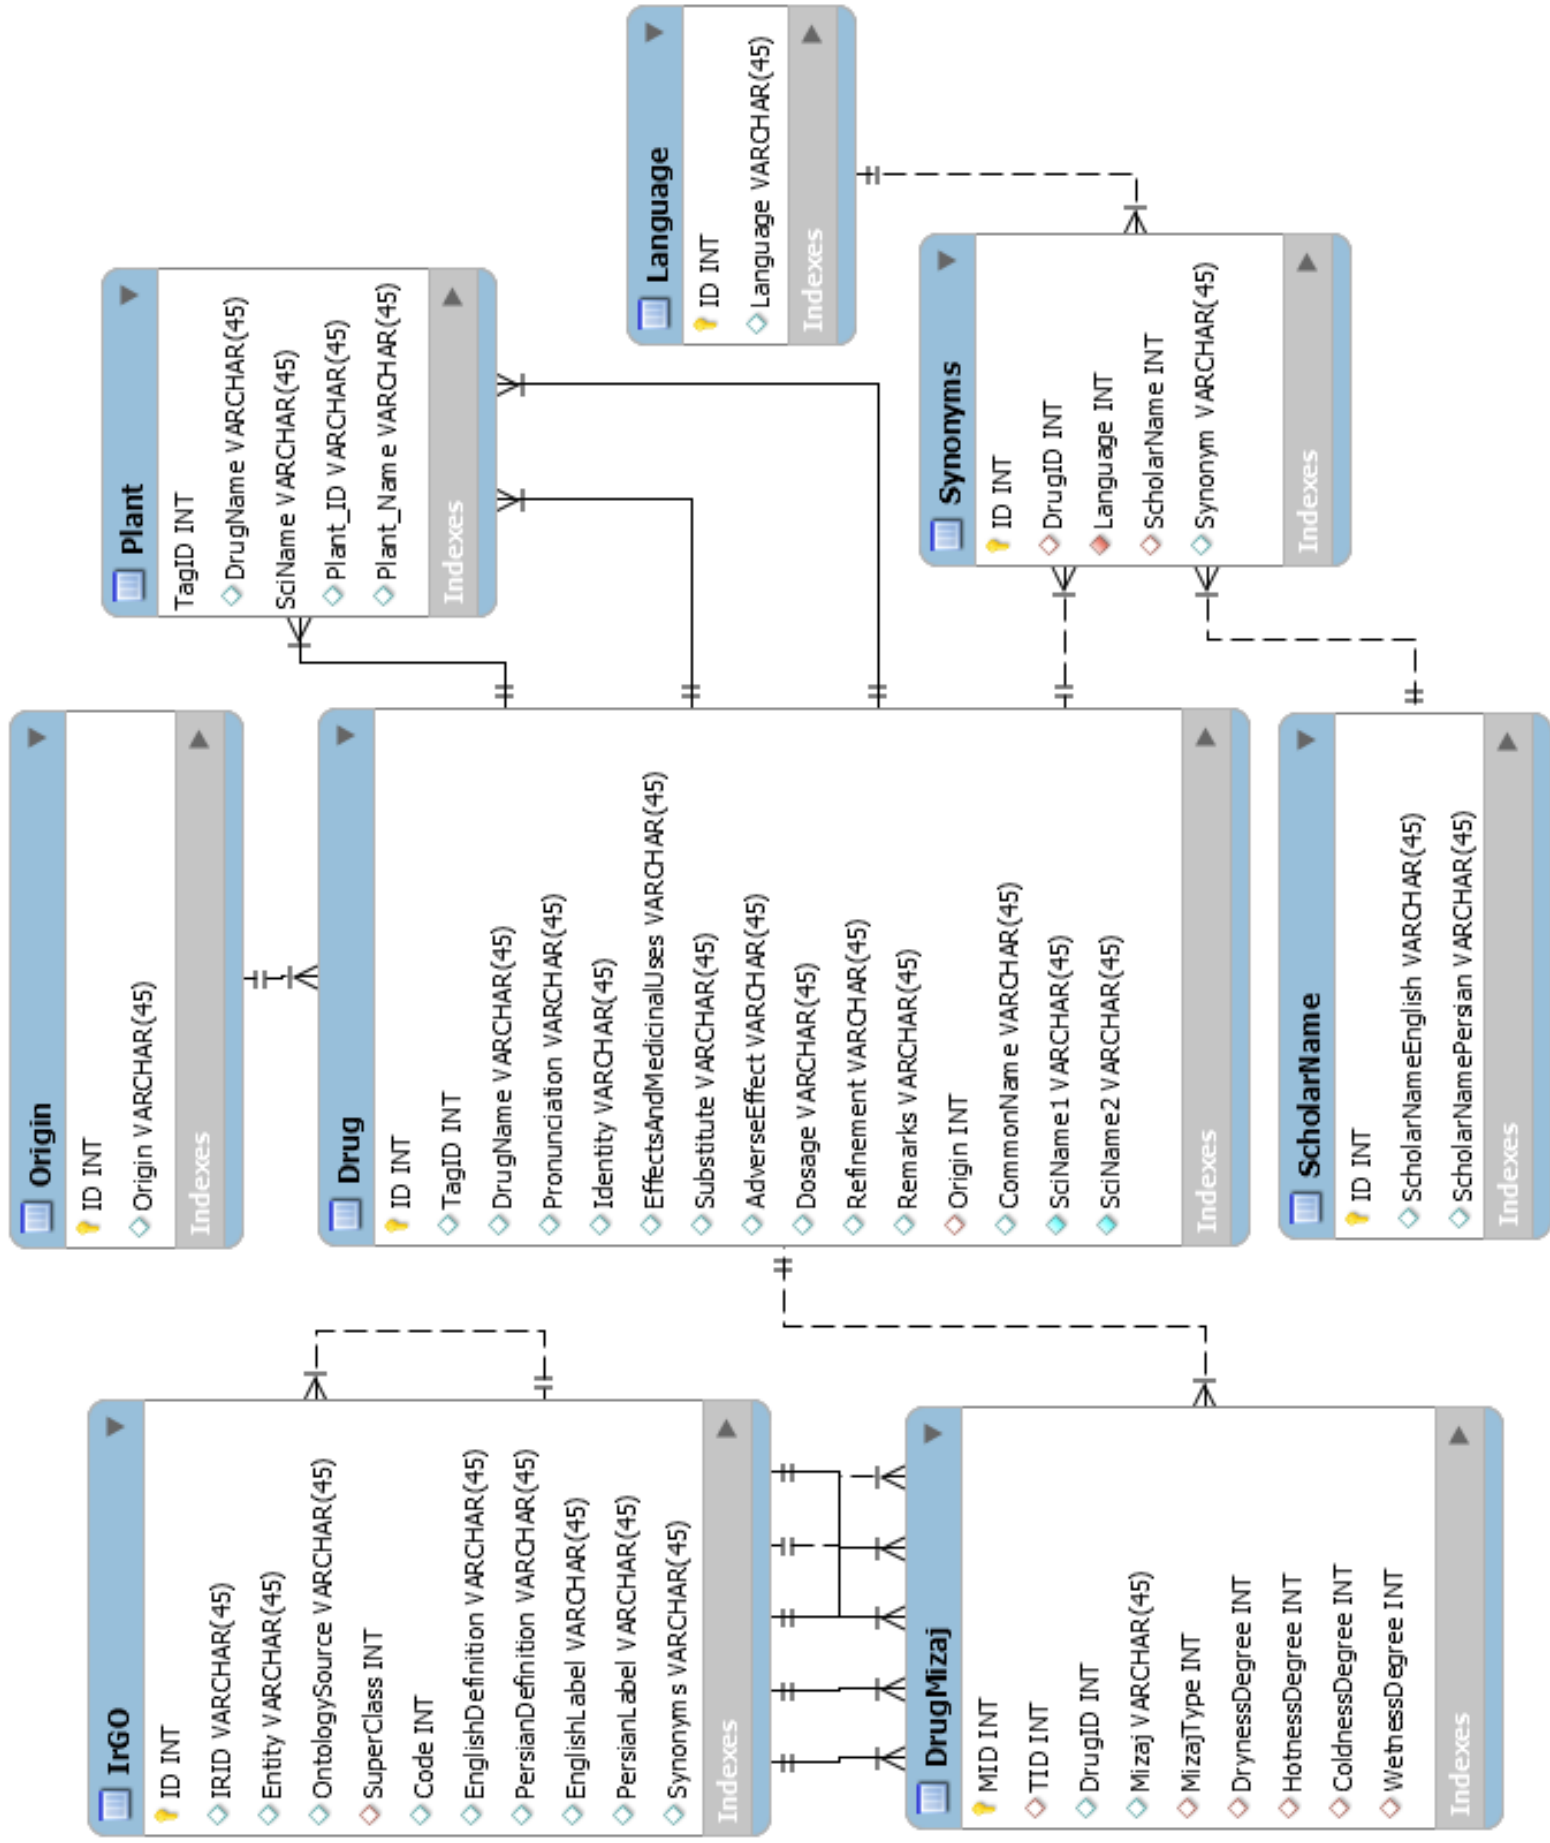

Supplement: f1 [file 3690781.f1.pdf]
